# Supplementary material for: A pyridinium salt with crystalline phase transformation under water vapor and reversible mechanochromic luminescent properties
Source: Royal Society of Chemistry journal article supplement (doi:10.1039/d1tc01540k), 2021-01-01
Supplement: d1tc01540k1.pdf [file d1tc01540k1.pdf]

## **Electronic Supporting Information**

### **Pyridinium salt with crystalline phase transformation under water vapor and reversible mechanochromism luminescent property**

Y. Chen, X. Li, Dr. W. Che, L. Tu, Dr. Y. Xie, Prof. Z. Li

Institute of Molecular Aggregation Science, Tianjin University, Tianjin 300072, China

E-mail: xieyujun@tju.edu.cn;

lizhentju@tju.edu.cn or lizhen@whu.edu.cn.

Prof. Z. Li

Joint School of National University of Singapore and Tianjin University, International Campus of Tianjin University, Binhai New City, Fuzhou 350207, China

Department of Chemistry, Wuhan University, Wuhan 430072, China

## Experimental section

### Reagents and materials

All reagents and solvents were purchased from commercial sources, *N,N*-dimethylformamide (DMF) was further dried over by refluxing with Calcium hydride then collected under vacuum distillation before use.

### Computational study

(TD)DFT calculation is performed on Gaussian 09 program (Revision D.01).<sup>1</sup> The ground state ( $S_0$ ) geometry is optimized with the Becke's three-parameter exchange functional along with the Lee Yang Parr's correlation functional (B3LYP) using 6-31G(d) basis sets. While geometry at excited state ( $S_1$ ) is optimized via TDDFT based on  $S_0$  geometry. The excitation energies in the  $n$ -th singlet ( $S_n$ ) states is revised by function of CAM-B3LYP.

### Measurements

Nuclear magnetic resonance ( $^1\text{H}$  and  $^{13}\text{C}$  NMR) spectra were obtained on a Bruker Ultra Shield plus 400 MHz spectrometer. Differential Scanning Calorimetry (DSC) curves were obtained with a NETZSCH DSC 214 thermal analyzer at the heating and cooling rate of  $10\text{ K min}^{-1}$  under  $\text{N}_2$  atmosphere. Thermogravimetric analyses (TGA) were recorded with a NETZSCH TG 209F3 thermal analyzer under nitrogen atmosphere with a heating rate of  $10\text{ K min}^{-1}$ . The powder X-ray diffraction patterns were recorded by RIGAKU SMARTLAB9KW with an X-ray source of  $\text{Cu K}\alpha$  ( $\lambda = 1.5418\text{ \AA}$ ) at 298 K at 50 KV and 15 mA at a scan rate of  $10^\circ (2\theta)\text{ min}^{-1}$  (scan range:  $3\text{-}60^\circ$ ). X-ray Single crystal diffraction for compounds data was performed on a diffractometer with CCD detector using  $\text{Cu K}\alpha$  radiation ( $\lambda = 1.5418\text{ \AA}$ ) source. UV-vis spectra were performed on a Shimadzu UV-2600. The steady-state fluorescence and phosphorescence spectra measurement were carried out by Hitachi F-4700 at 298 K and 77 K respectively. Commission internationale de l'éclairage (CIE) chromaticity coordinates images are calculated and drawn by CIE1931xy software based on the PL spectra. The lifetime and time-resolved emission spectra and PL quantum yield (PLQY) were obtained on Edinburgh FLS1000 fluorescence spectrophotometer.

### Synthesis

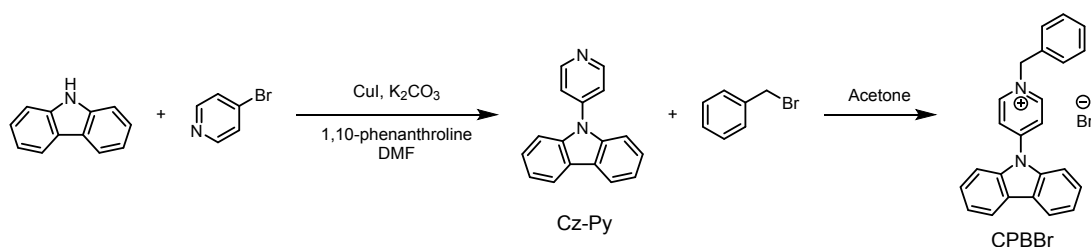

Scheme S1 The synthetic route of CPBBr.

**9-(Pyridin-4-yl)-9H-carbazole (Cz-Py):** Carbazole (1.672 g, 10 mmol), 4-bromopyridine hydrochloride (2.54 g, 13 mmol), cuprous iodide (0.3 g, 1.6 mmol), 1, 10-phenanthroline (0.6 g, 3.2 mmol), and potassium carbonate (5 g, 40 mmol) were dissolved in the dry DMF (60 ml). The mixed solution was heated to reflux under nitrogen atmosphere for 48 hours. After the reaction, the mixture was cooled to room temperature and ethyl acetate (50 mL) was added, the resultant solution was washed by deionized water for three times (3×100ml), the organic layer was concentrated after dried with anhydrous magnesium sulfate. The crude product was purified by silica gel column chromatography with eluent of hexane/ethyl acetate (20/3, hexane/ethyl acetate) to give Cz-py (1.91 g, 7.80 mmol) as white powder with the yield of 78%. <sup>1</sup>H NMR (400 MHz, Chloroform-d) δ (TMS, ppm): 8.88 – 8.81 (m, 2H), 8.17 – 8.10 (m, 2H), 7.62 – 7.56 (m, 2H), 7.55 (t, *J* = 1.0 Hz, 2H), 7.44 (ddd, *J* = 8.4, 7.2, 1.4 Hz, 2H), 7.38 – 7.28 (m, 2H)

**1-Benzyl-4-(9H-carbazol-9-yl)pyridin-1-ium (CPBBr):** Cz-Py (0.488 g, 2 mmol) was dissolved in acetone (8 mL), then the solution of benzyl bromide/acetone (0.708 ml, 6 mmol/5 mL) was added dropwise under magnetic stirring. The resultant mixture was heated to 50 °C and refluxing for 18 h, the product was precipitated. After the precipitate was washed with ether (3×15 ml) for three times, the colorless needle-like solid was obtained (0.751g, 1.81 mmol) with the yield of 90%. <sup>1</sup>H NMR (400 MHz, DMSO-*d*<sub>6</sub>) δ (TMS, ppm): 9.29 (d, *J* = 8 Hz, 2H), 8.56 (d, *J* = 8 Hz, 2H), 8.32 (d, *J* = 8 Hz, 2H), 7.90 (d, *J* = 8 Hz, 2H), 7.70 – 7.58 (m, 2H), 7.60 – 7.52 (m, 2H), 7.51 – 7.41 (m, 5H), 5.91 (s, 2H). <sup>13</sup>C NMR (101 MHz, DMSO-*d*<sub>6</sub>) δ (ppm): 151.49, 146.84, 138.46, 135.09, 129.86, 129.78, 129.44, 127.81, 125.47, 123.82, 123.10, 121.56, 111.80, 62.58.

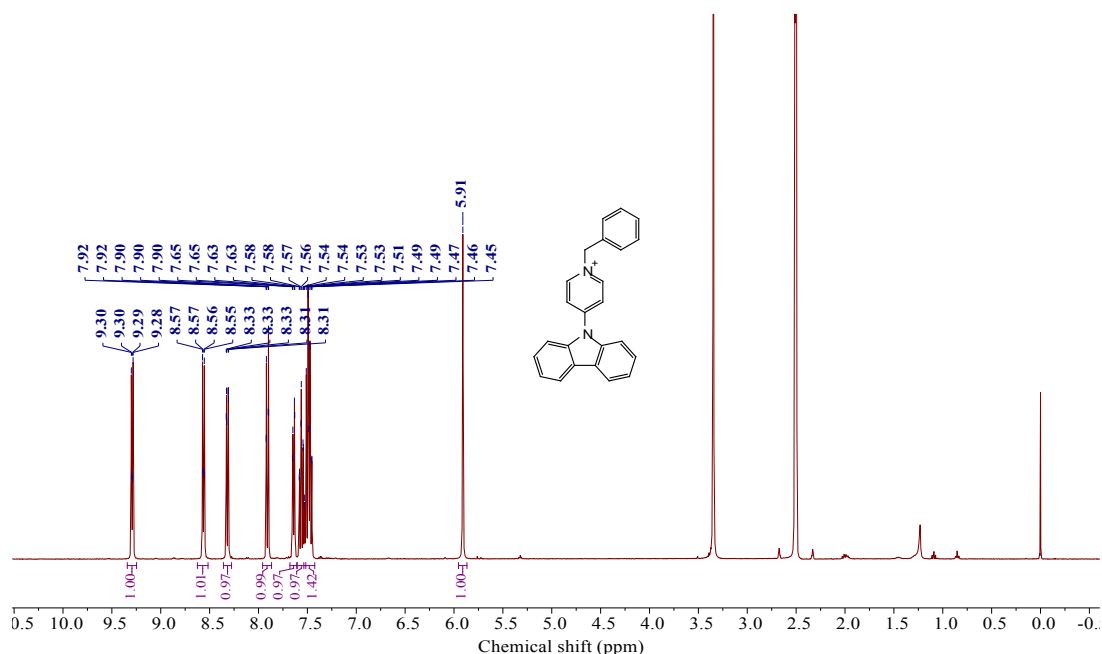

Fig. S1 <sup>1</sup>H NMR spectrum of CPBBr in DMSO-*d*<sub>6</sub> solution

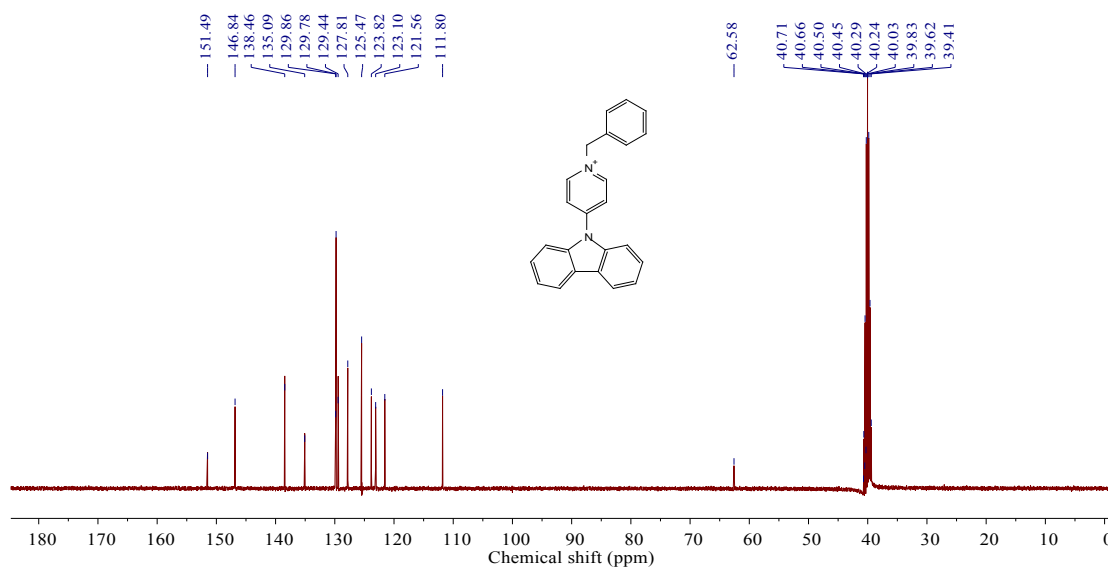

Fig. S2  $^{13}\text{C}$  NMR spectrum of CPBBr in  $\text{DMSO-}d_6$  solution

Table S1. The absorption wavelength of CPBBr in various solvents and corresponding  $E_T^N$  values.

| Solvent         | $E_T^N$ | $\lambda_{\text{abs}}$ (nm) |
|-----------------|---------|-----------------------------|
| Dichloromethane | 0.309   | 308                         |
| N-propanol      | 0.617   | 302                         |
| Ethanol         | 0.654   | 300                         |
| Methanol        | 0.762   | 297                         |
| Water           | 1.000   | 291                         |

$E_T^N$  = the normalized Reichardt's parameter

Table S2. PL parameters of CPBBr-W and CPBBr-G in different state.

| Compound       | $\lambda$ (nm) | $\tau$ (ns) | $\Phi_{\text{PL}}$ (%) |
|----------------|----------------|-------------|------------------------|
| CPBBr-W        | 422            | 1.38        | 5.8                    |
| CPBBr-W-ground | 505            | 1735.29     | 18.0                   |
| CPBBr-G        | 471            | 4.14        | 29.6                   |
| CPBBr-G-ground | 513            | 2319.99     | 25.9                   |
| CPBBr-CD       | 509            | 6.27        | 30.6                   |

$\Phi_{\text{PL}}$ =PL quantum yield,  $\lambda_{\text{em}}$ =emission maximum, CD=cyclodextrin. The preparation of CPBBr-CD film: cyclodextrin (CD, 1 mmol) and CPBBr (1 mmol) were dissolved in deionized water (20 mL), the pale-yellow film can be obtained after removing water by rotary evaporation.

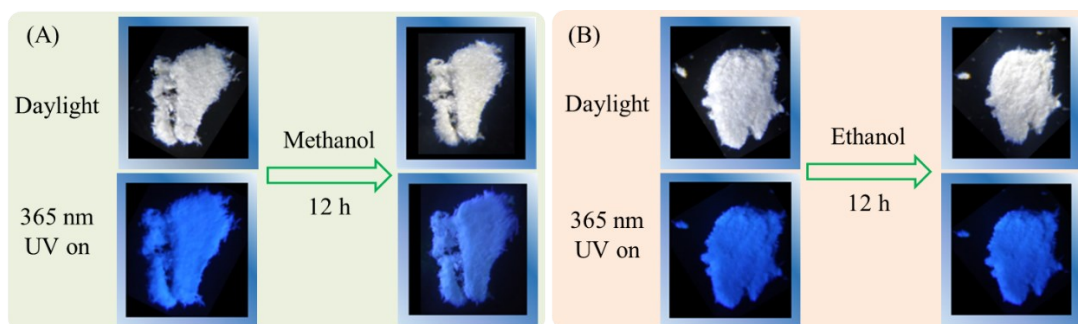

Fig. S3 Daylight and 365 nm UV light photograph of crystallite sample of CPBBr-W under (A) methanol vapor and (B) ethanol vapor at 25 °C in a sealed container.

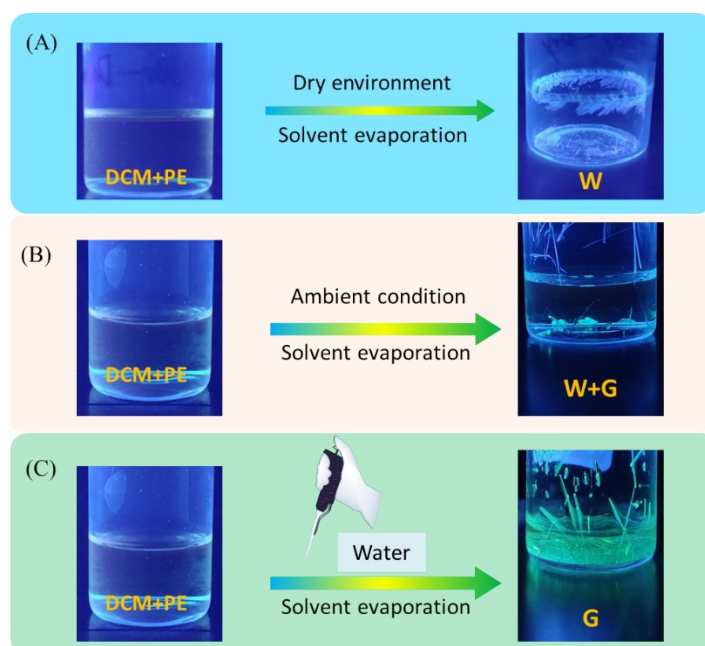

Fig. S4 Single crystal was cultivated by solvent evaporation. (A) In mixture solution of DCM and petroleum ether (PE) (V/V, 1/1) under dry environment, only CPBBr-W crystal was obtained; (B) under ambient condition, both CPBBr-W and CPBBr-G crystals were obtained; (C) when trace amount of water was added in DCM/PE solution, only CPBBr-G crystal obtained.

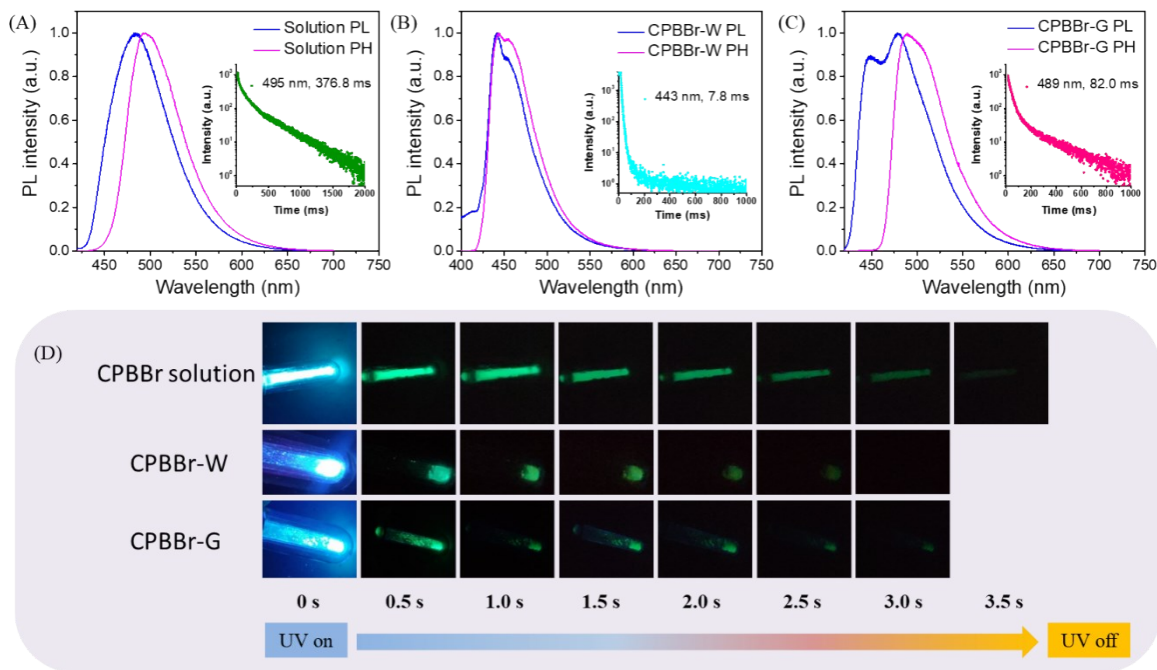

Fig. S5 The PL and phosphorescence (PH) spectra of CPBBr in the DCM solution ( $3 \times 10^{-5}$  M) (A), CPBBr-W (B) and CPBBr-G (C) at 77 K,  $\lambda_{\text{EX}}=365$  nm, inserts show the corresponding time resolved phosphorescence decay curves; (D) Photographs of CPBBr solution, CPBBr-W, and CPBBr-G under 365 nm UV on and UV off at 77 K.

Table S3. The emission maximum of PL, phosphorescence (PH), and phosphorescence lifetime of CPBBr solution (in DCM), CPBBr-W and CPBBr-G at 77 K.

|                         | CPBBr solution | CPBBr-W | CPBBr-G |
|-------------------------|----------------|---------|---------|
| PL (nm)                 | 484            | 442     | 447/479 |
| PH (nm)                 | 495            | 443     | 489     |
| $\tau_{\text{PH}}$ (ms) | 376.8          | 7.8     | 82.0    |

Table S4. Unit cell parameters of single crystals of CPBBr-G and CPBBr-W and experimental details

|                   | <b>CPBBr-G</b>                                   | <b>CPBBr-W</b>                           |
|-------------------|--------------------------------------------------|------------------------------------------|
| CCDC number       | 2068450                                          | 2068451                                  |
| Empirical formula | $\text{C}_{24}\text{H}_{21}\text{BrN}_2\text{O}$ | $\text{C}_{24}\text{H}_{19}\text{BrN}_2$ |
| Formula weight    | 433.34                                           | 43.72                                    |
| Temperature (K)   | 293(2)                                           | 293(2)                                   |
| Crystal system    | triclinic                                        | orthorhombic                             |
| Space group       | P-1                                              | $\text{P}2_12_12_1$                      |
| a (Å)             | 7.1414(3)                                        | 5.20980(10)                              |
| b (Å)             | 9.7611(4)                                        | 13.45740(10)                             |

|                                            |                                                               |                                                               |
|--------------------------------------------|---------------------------------------------------------------|---------------------------------------------------------------|
| c (Å)                                      | 14.7917(6)                                                    | 28.7733(3)                                                    |
| $\alpha$ (°)                               | 102.789(4)                                                    | 90                                                            |
| $\beta$ (°)                                | 96.075(3)                                                     | 90                                                            |
| $\gamma$ (°)                               | 98.261(3)                                                     | 90                                                            |
| Volume (Å <sup>3</sup> )                   | 984.91(7)                                                     | 2017.31(5)                                                    |
| Z                                          | 2                                                             | 38                                                            |
| $\rho_{\text{calc}}$ (g cm <sup>-3</sup> ) | 1.461                                                         | 1.367                                                         |
| $\mu$ (mm <sup>-1</sup> )                  | 2.969                                                         | 2.839                                                         |
| F(000)                                     | 444.0                                                         | 848.0                                                         |
| Crystal size (mm <sup>3</sup> )            | 0.4 × 0.3 × 0.2                                               | 0.4 × 0.3 × 0.2                                               |
| Radiation                                  | Cu K $\alpha$ ( $\lambda$ = 1.54184)                          | Cu K $\alpha$ ( $\lambda$ = 1.54184)                          |
| 2 $\Theta$ range for data collection (°)   | 9.432 to 146.18                                               | 7.252 to 134.144                                              |
| Index ranges                               | -8 ≤ h ≤ 8, -12 ≤ k ≤ 11, -18 ≤ l ≤ 18                        | -6 ≤ h ≤ 5, -16 ≤ k ≤ 16, -34 ≤ l ≤ 34                        |
| Reflections collected                      | 6658                                                          | 30924                                                         |
| Independent reflections                    | 3819 [R <sub>int</sub> = 0.0193, R <sub>sigma</sub> = 0.0262] | 3602 [R <sub>int</sub> = 0.0297, R <sub>sigma</sub> = 0.0124] |
| Data/restraints/parameters                 | 3819/0/261                                                    | 3602/0/244                                                    |
| Goodness-of-fit on F <sup>2</sup>          | 1.070                                                         | 1.083                                                         |
| Final R indexes [I ≥ 2 $\sigma$ (I)]       | R <sub>1</sub> = 0.0312, wR <sub>2</sub> = 0.0827             | R <sub>1</sub> = 0.0255, wR <sub>2</sub> = 0.0793             |
| Final R indexes [all data]                 | R <sub>1</sub> = 0.0335, wR <sub>2</sub> = 0.0848             | R <sub>1</sub> = 0.0261, wR <sub>2</sub> = 0.0799             |

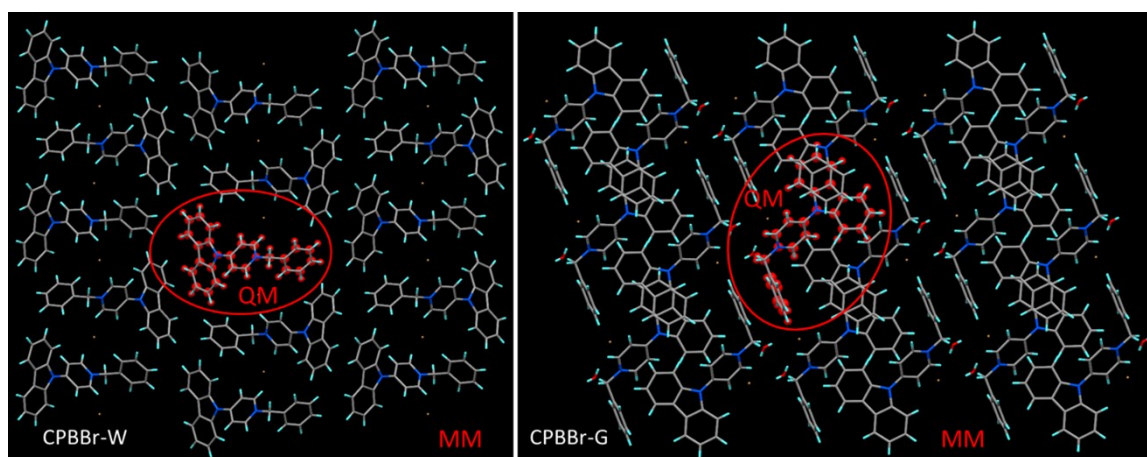

Fig. S6 The ONIOM model of molecular cluster that extracted from single crystal, which compose of 65 molecules for CPBBr-W and 54 molecules for CPBBr-G. The molecule marked in red is divided into high layer and calculated by quantum mechanical (QM) method at DFT/B3LYP/6-31G(d) level, while the rest of molecules are chosen as low layer and simulated via molecular mechanical (MM) method of universal force field (UFF).



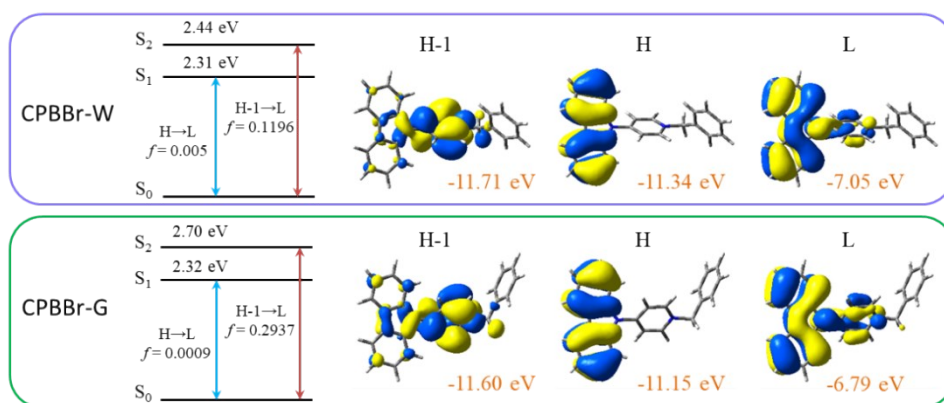

Fig. S7 Molecular energy level of  $S_0$ ,  $S_1$ , and  $S_2$  states, orbital contribution, and oscillator strength ( $f$ ) of CPBBR-W and CPBBR-G, frontier molecular orbitals of HOMO-1 (H-1), HOMO (H), and LUMO (L), the excitation energy is calculated by CAM-B3LYP/6-31G(d) method.

Table S5. The calculated excitation energy of  $S_1$ ,  $S_2$ , and  $S_3$  at optimized  $S_1$  geometry, and the corresponding molecule orbital contribution, oscillator strength ( $f$ ).

| Crystal | n-th transition | Excitation energy (eV) | Molecular orbital contribution                             | Oscillator strength ( $f$ ) |
|---------|-----------------|------------------------|------------------------------------------------------------|-----------------------------|
| CPBBR-W | $S_1$           | 2.31                   | H-1 $\rightarrow$ L (0.027), H $\rightarrow$ L (0.957)     | 0.005                       |
|         | $S_2$           | 2.44                   | H-1 $\rightarrow$ L (0.938), H $\rightarrow$ L (0.028)     | 0.1196                      |
|         | $S_3$           | 3.76                   | H-1 $\rightarrow$ L+1 (0.436), H $\rightarrow$ L+1 (0.545) | 0.0008                      |
| CPBBR-G | $S_1$           | 2.32                   | H $\rightarrow$ L (0.984)                                  | 0.0009                      |
|         | $S_2$           | 2.70                   | H-1 $\rightarrow$ L (0.97)                                 | 0.2937                      |
|         | $S_3$           | 3.77                   | H $\rightarrow$ L+1 (0.989)                                | 0.0003                      |

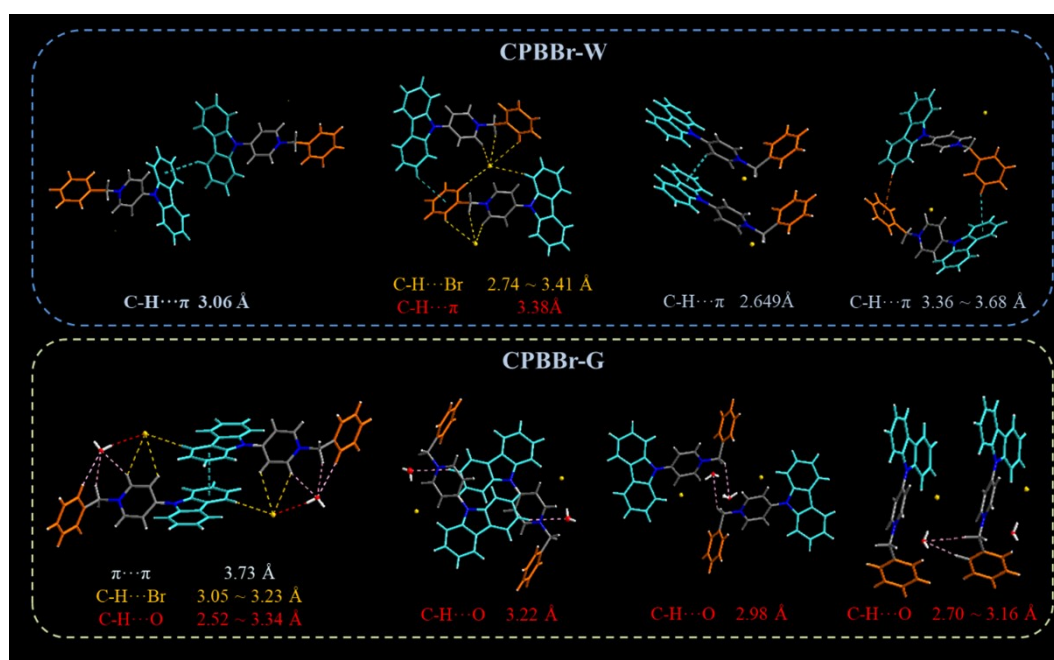

Fig. S8 The intermolecular hydrogen bonding and  $\pi\cdots\pi$  interaction of dimers that extracted from CPBBR-W and CPBBR-G.



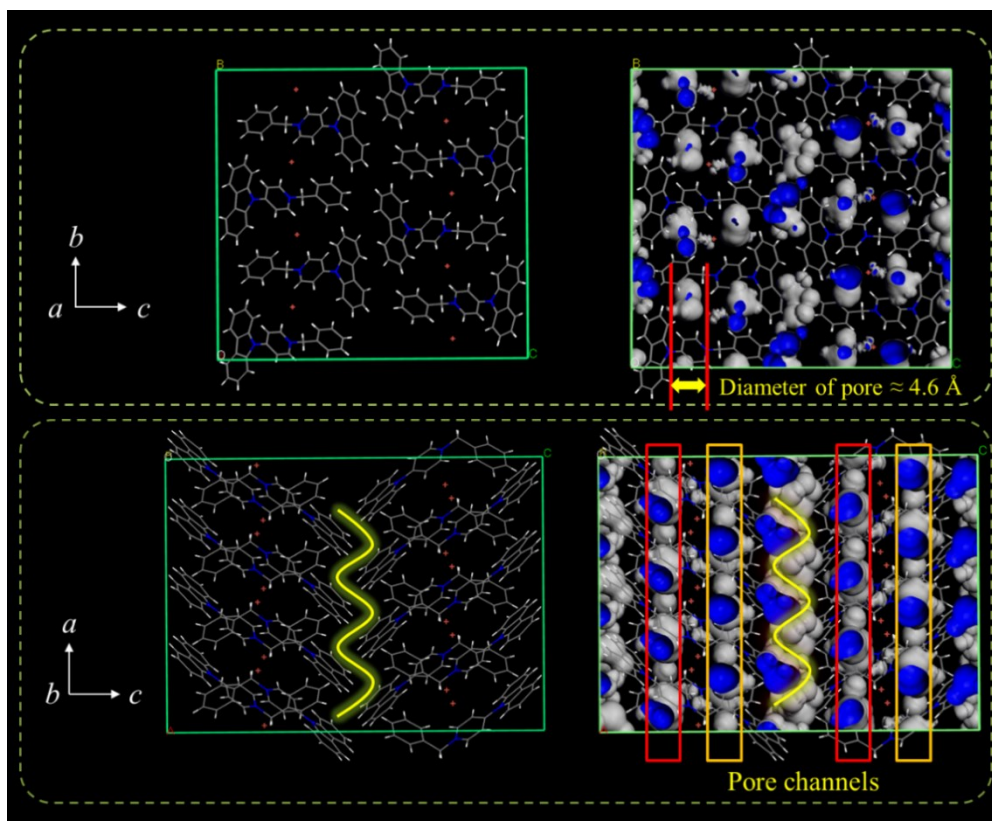

Fig. S9 Schematic presentation of free volume isosurface (0.141) of CPBBr-W from a- and b-axis, lots of pore channels are found along a-axis and near bromide ion, the diameter of pore is about 4.6 Å. The pore channel locates at intersection area of molecular cluster (labelled as yellow line) is crooked and the diameter is less than 3 Å.

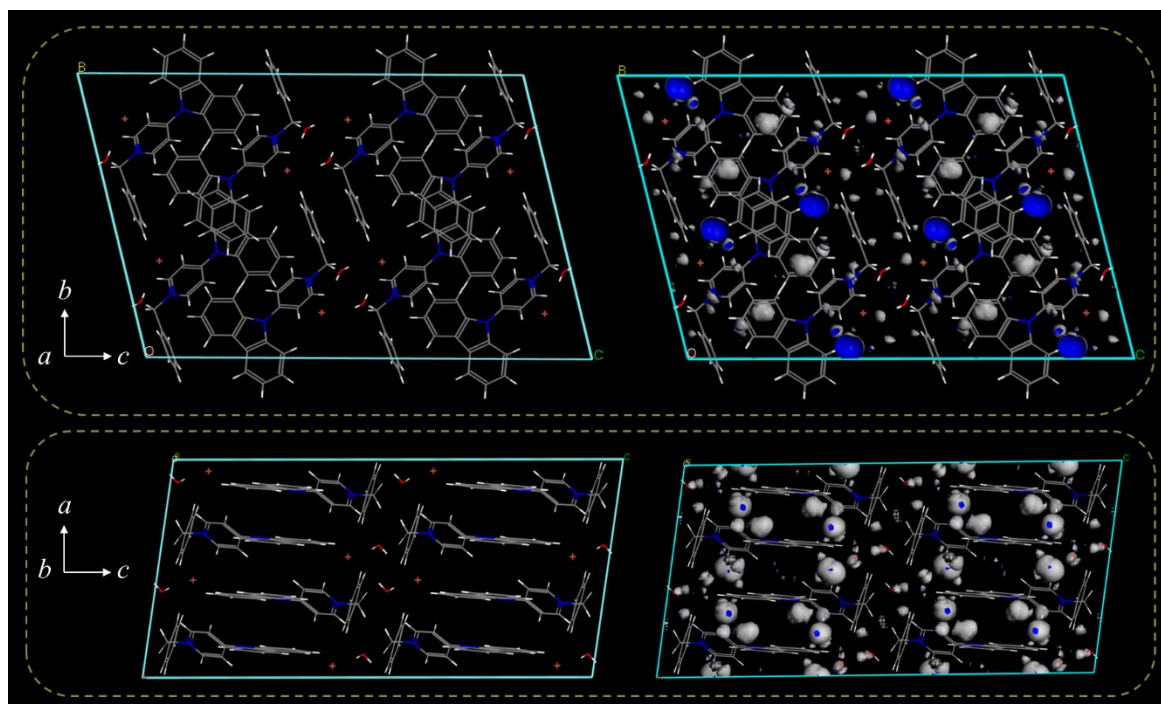

Fig. S10 Schematic presentation of free volume isosurface (0.021) of CPBBr-G from a- and b-axis.

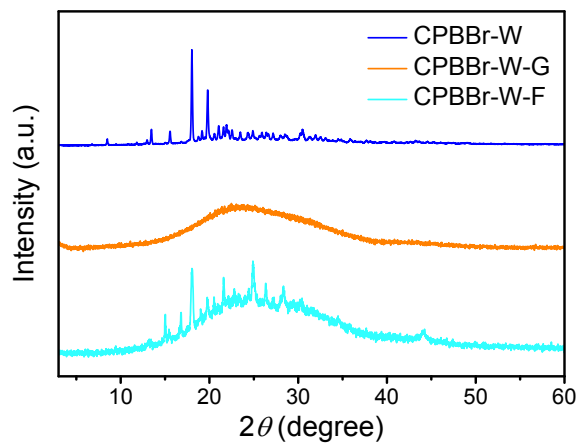

Fig. S11 PXR D patterns of CPBBR-W, ground sample, (CPBBR-W-G), and further fuming by DCM (CPBBR-W-F).

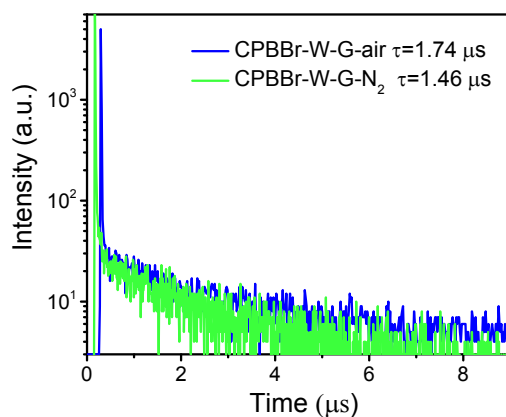

Fig. S12 Fluorescence lifetime of CPBBR-W-G in air and nitrogen ( $N_2$ ) atmosphere ( $\lambda_{Ex}=365$  nm).

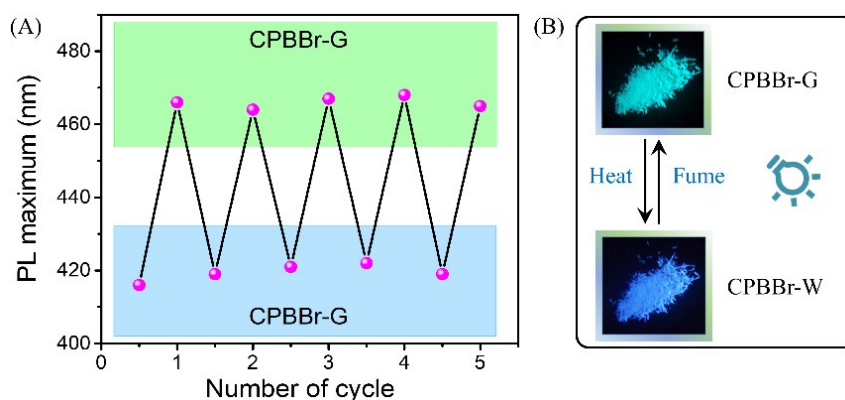

Fig. S13 (A) The PL variation between CPBBR-G and CPBBR-W under cyclic water fuming and heating at 100 °C in a vacuum; (B) photographs of CPBBR-G and CPBBR-W under 365 nm UV light.

Table S6. CIE chromaticity coordinates of CPBBr-W and CPBBr-G under different states.

| Compound states | CIE (x, y)     | Compound states | CIE (x, y)     |
|-----------------|----------------|-----------------|----------------|
| CPBBr-W         | (0.159, 0.057) | CPBBr-G         | (0.170, 0.294) |
| CPBBr-W-G       | (0.248, 0.454) | CPBBr-G-G       | (0.277, 0.51)  |
| CPBBr-W-F       | (0.164, 0.119) | CPBBr-G-F       | (0.170, 0.294) |

## Reference

1. M. J. Frisch, G. W. Trucks, H. B. Schlegel, G. E. Scuseria, M. A. Robb, J. R. Cheeseman, G. Scalmani, V. Barone, B. Mennucci, G. A. Petersson, H. Nakatsuji, M. Caricato, X. Li, H. P. Hratchian, A. F. Izmaylov, J. Bloino, G. Zheng, J. L. Sonnenberg, M. Hada, M. Ehara, K. Toyota, R. Fukuda, J. Hasegawa, M. Ishida, T. Nakajima, Y. Honda, O. Kitao, H. Nakai, T. Vreven, J. A. Montgomery, Jr., J. E. Peralta, F. Ogliaro, M. Bearpark, J. J. Heyd, E. Brothers, K. N. Kudin, V. N. Staroverov, T. Keith, R. Kobayashi, J. Normand, K. Raghavachari, A. Rendell, J. C. Burant, S. S. Iyengar, J. Tomasi, M. Cossi, N. Rega, J. M. Millam, M. Klene, J. E. Knox, J. B. Cross, V. Bakken, C. Adamo, J. Jaramillo, R. Gomperts, R. E. Stratmann, O. Yazyev, A. J. Austin, R. Cammi, C. Pomelli, J. W. Ochterski, R. L. Martin, K. Morokuma, V. G. Zakrzewski, G. A. Voth, P. Salvador, J. J. Dannenberg, S. Dapprich, A. D. Daniels, O. Farkas, J. B. Foresman, J. V. Ortiz, J. Cioslowski, and D. J. Fox, Gaussian, Inc., Wallingford CT, 2013.
